# Supplementary material for: EPR spectrum of the Y@C82 metallofullerene isolated in solid argon matrix: hyperfine structure from EPR spectroscopy and relativistic DFT calculations
Source: Royal Society of Chemistry journal article supplement (doi:10.1039/b926279b), 2010-01-01
Supplement: b926279b.pdf [file b926279b.pdf]

## Supporting Information

Paper:

### **EPR spectrum of the Y@C<sub>82</sub> metallofullerene isolated in solid argon matrix: hyperfine structure from EPR spectroscopy and relativistic DFT calculations**

Authors:

*Eugenii Ya. Misochko,\* Alexander V. Akimov, Vasilii A. Belov, Daniil A. Tyurin, Vyacheslav P. Bubnov,  
Ivan. E. Kareev, and Eduard B. Yagubskii*

### **Calculated structures and vibrational frequencies of endometallofullerenes Sc@C<sub>82</sub>, Y@C<sub>82</sub>, and La@C<sub>82</sub>.**

1.===== Sc@C<sub>82</sub> scalar relativistic PBE/L2//PBE/L2 =====

Atomic Coordinates:

|    |             |             |             |
|----|-------------|-------------|-------------|
| 21 | 0.07997313  | 2.30834246  | -0.00799871 |
| 6  | 3.85104996  | 1.18380877  | -1.21053456 |
| 6  | 3.70571567  | 1.90298833  | 0.00377382  |
| 6  | 2.81274859  | 3.02814281  | -0.00156002 |
| 6  | 3.84379995  | 1.18958949  | 1.22233018  |
| 6  | 4.03791956  | -0.22813592 | 1.22340909  |
| 6  | 4.05242657  | -0.98086070 | 0.01165685  |
| 6  | 4.04515405  | -0.23390044 | -1.20372045 |
| 6  | 3.05231417  | 1.54825592  | 2.38467186  |
| 6  | 2.14738253  | 2.63238887  | 2.35234286  |
| 6  | 2.07290685  | 3.43311483  | 1.15264158  |
| 6  | 0.95220796  | 2.51325881  | 3.10522851  |
| 6  | 2.82251904  | -1.99746449 | 2.41057412  |
| 6  | 3.38534738  | -0.73724560 | 2.40516991  |
| 6  | 2.72128488  | 0.33729651  | 3.08968272  |
| 6  | 1.44384241  | 0.14602306  | 3.69357342  |
| 6  | 0.60226882  | 1.29439436  | 3.76197407  |
| 6  | 2.88764044  | -2.82543851 | -1.19309286 |
| 6  | 3.45671693  | -2.32142516 | 0.01306764  |
| 6  | 2.88045109  | -2.81970794 | 1.21819601  |
| 6  | -0.26523053 | 3.15408523  | 2.64803223  |
| 6  | -0.32911869 | 3.99030198  | 1.48619450  |
| 6  | 0.90581898  | 4.19288443  | 0.73199799  |
| 6  | -1.54659506 | 3.89959964  | 0.71540202  |
| 6  | -1.36641747 | 2.32697635  | 3.08701346  |
| 6  | -3.28648637 | 1.03420298  | 2.36749441  |
| 6  | -2.56716318 | 2.25112586  | 2.33109964  |
| 6  | -2.63122282 | 3.04503003  | 1.13937080  |
| 6  | 1.57864376  | -2.23707052 | 3.09541067  |
| 6  | 0.81833861  | -1.17646749 | 3.66605198  |
| 6  | -0.64405395 | -1.29345558 | 3.66091254  |
| 6  | -1.47498478 | -0.08750802 | 3.68272756  |
| 6  | -0.83050243 | 1.17966825  | 3.75152514  |
| 6  | -2.76414540 | -0.10446791 | 3.07165989  |
| 6  | -1.54222533 | 3.89611698  | -0.74863941 |
| 6  | -0.32017294 | 3.98316170  | -1.51257330 |
| 6  | 0.91024032  | 4.18934009  | -0.75199396 |
| 6  | -0.24937417 | 3.14144549  | -2.67002960 |

|   |             |             |             |
|---|-------------|-------------|-------------|
| 6 | -2.62431781 | 3.03952993  | -1.17500777 |
| 6 | -3.27227599 | 1.02287955  | -2.39745523 |
| 6 | -2.55316461 | 2.23997053  | -2.36254841 |
| 6 | -1.34793147 | 2.31224571  | -3.11163728 |
| 6 | -4.00585157 | 0.55544176  | 1.19984605  |
| 6 | -3.98651551 | 1.28910488  | -0.01770674 |
| 6 | -3.30956981 | 2.55420228  | -0.01869362 |
| 6 | -3.99859879 | 0.54966601  | -1.23185463 |
| 6 | 0.97076180  | 2.49847086  | -3.11690925 |
| 6 | 2.16142307  | 2.62118815  | -2.35747637 |
| 6 | 2.07979842  | 3.42760038  | -1.16206157 |
| 6 | 3.06652197  | 1.53693243  | -2.37926484 |
| 6 | 0.62472931  | 1.27649803  | -3.76993682 |
| 6 | 1.46586552  | 0.12847737  | -3.69106384 |
| 6 | 2.73968677  | 0.32263184  | -3.08048358 |
| 6 | 2.83683525  | -2.00887541 | -2.38969324 |
| 6 | 3.39963914  | -0.74863689 | -2.38692211 |
| 6 | -1.20153429 | -2.47629917 | -3.08796310 |
| 6 | -0.62221024 | -1.31086066 | -3.66401958 |
| 6 | 0.84018983  | -1.19387726 | -3.66099012 |
| 6 | 1.59706201  | -2.25174902 | -3.08079348 |
| 6 | -0.80807973 | 1.16180218  | -3.76748690 |
| 6 | -2.74576203 | -0.11911694 | -3.09307590 |
| 6 | -1.45297978 | -0.10504213 | -3.69651721 |
| 6 | -1.11137442 | -3.88455617 | -1.19934796 |
| 6 | -0.40608822 | -3.44776096 | -2.38927771 |
| 6 | 0.96461438  | -3.33855299 | -2.38617193 |
| 6 | -1.11854583 | -3.87884748 | 1.20563246  |
| 6 | -0.40409178 | -4.14491374 | 0.00588580  |
| 6 | -3.22684031 | -1.28391676 | -2.40233852 |
| 6 | -2.40060625 | -3.24551043 | 1.20288370  |
| 6 | -3.04461868 | -2.84588612 | -0.00507280 |
| 6 | -2.39341917 | -3.25123189 | -1.20725433 |
| 6 | -2.46834884 | -2.43607938 | -2.40272850 |
| 6 | -2.48266022 | -2.42468348 | 2.39399937  |
| 6 | -3.24111450 | -1.27254377 | 2.38360816  |
| 6 | -3.96326042 | -0.87433666 | 1.19942674  |
| 6 | -3.85042000 | -1.62115602 | -0.01038900 |
| 6 | -3.95602971 | -0.88009329 | -1.22439058 |
| 6 | 0.95033305  | -3.32716995 | 2.40220425  |
| 6 | -0.42036457 | -3.43638180 | 2.39765371  |
| 6 | -1.21995136 | -2.46162242 | 3.08695475  |
| 6 | 1.72445715  | -3.65725704 | -1.19196287 |
| 6 | 1.06153916  | -4.02697794 | 0.00997744  |
| 6 | 1.71728081  | -3.65154105 | 1.21408089  |

#

Vibrational frequencies

|       |       |       |       |       |       |       |
|-------|-------|-------|-------|-------|-------|-------|
| freq. | 55.6  | 64.0  | 196.1 | 209.6 | 211.6 | 214.1 |
| freq. | 219.5 | 261.0 | 269.8 | 271.9 | 273.0 | 275.1 |
| freq. | 285.9 | 294.9 | 323.5 | 328.0 | 336.2 | 339.5 |
| freq. | 340.6 | 343.1 | 348.1 | 351.5 | 353.6 | 356.1 |
| freq. | 361.1 | 361.7 | 376.3 | 379.0 | 402.0 | 413.4 |
| freq. | 414.1 | 426.7 | 432.6 | 437.4 | 442.4 | 449.1 |

|       |        |        |        |        |        |        |
|-------|--------|--------|--------|--------|--------|--------|
| freq. | 454.3  | 466.5  | 467.5  | 472.3  | 478.1  | 480.0  |
| freq. | 482.6  | 487.7  | 491.2  | 492.0  | 496.5  | 498.1  |
| freq. | 499.6  | 505.3  | 509.9  | 511.0  | 513.8  | 517.4  |
| freq. | 519.0  | 522.4  | 534.5  | 560.0  | 569.3  | 574.3  |
| freq. | 588.3  | 589.0  | 589.5  | 591.9  | 611.4  | 613.1  |
| freq. | 615.0  | 622.7  | 623.9  | 627.5  | 630.5  | 639.8  |
| freq. | 644.2  | 647.3  | 649.4  | 652.0  | 652.3  | 660.1  |
| freq. | 664.7  | 669.8  | 672.6  | 674.5  | 682.9  | 683.2  |
| freq. | 685.8  | 686.3  | 689.3  | 690.7  | 691.4  | 699.5  |
| freq. | 709.3  | 711.5  | 714.1  | 716.9  | 718.2  | 724.1  |
| freq. | 724.8  | 728.5  | 729.5  | 735.4  | 738.4  | 742.6  |
| freq. | 744.7  | 751.3  | 754.3  | 755.6  | 760.7  | 765.4  |
| freq. | 766.3  | 767.8  | 772.2  | 772.5  | 775.9  | 777.1  |
| freq. | 789.0  | 790.2  | 790.3  | 791.8  | 792.7  | 793.3  |
| freq. | 797.1  | 797.9  | 801.7  | 824.2  | 829.0  | 836.9  |
| freq. | 847.9  | 859.1  | 861.6  | 867.5  | 868.7  | 874.2  |
| freq. | 875.0  | 879.4  | 887.6  | 920.6  | 1003.4 | 1005.6 |
| freq. | 1007.6 | 1014.8 | 1015.4 | 1021.5 | 1025.2 | 1032.4 |
| freq. | 1036.4 | 1107.9 | 1114.7 | 1117.5 | 1120.5 | 1124.7 |
| freq. | 1133.9 | 1136.6 | 1140.3 | 1156.8 | 1158.9 | 1160.9 |
| freq. | 1174.7 | 1178.1 | 1186.9 | 1190.7 | 1199.7 | 1201.8 |
| freq. | 1206.0 | 1213.4 | 1213.6 | 1224.8 | 1228.2 | 1230.4 |
| freq. | 1239.8 | 1245.0 | 1254.2 | 1256.5 | 1260.4 | 1264.2 |
| freq. | 1265.0 | 1269.9 | 1271.1 | 1273.6 | 1280.7 | 1294.0 |
| freq. | 1306.6 | 1308.1 | 1308.7 | 1315.1 | 1315.4 | 1318.5 |
| freq. | 1320.8 | 1324.8 | 1328.6 | 1332.1 | 1332.7 | 1334.0 |
| freq. | 1338.0 | 1340.4 | 1349.8 | 1351.2 | 1353.8 | 1364.0 |
| freq. | 1364.0 | 1368.4 | 1370.6 | 1372.9 | 1375.5 | 1379.0 |
| freq. | 1379.7 | 1381.7 | 1395.2 | 1401.5 | 1407.2 | 1412.7 |
| freq. | 1412.9 | 1416.0 | 1422.8 | 1423.4 | 1426.8 | 1432.7 |
| freq. | 1433.9 | 1436.0 | 1441.8 | 1443.4 | 1451.9 | 1456.8 |
| freq. | 1462.9 | 1469.5 | 1476.1 | 1476.5 | 1482.4 | 1490.0 |
| freq. | 1491.9 | 1492.5 | 1508.1 | 1509.7 | 1511.6 | 1514.9 |
| freq. | 1516.4 | 1516.6 | 1517.8 | 1562.6 | 1573.0 | 1579.6 |
| freq. | 1580.3 | 1603.8 | 1610.9 |        |        |        |

---

2. ===== Y@C<sub>82</sub> scalar relativistic PBE/L2//PBE/L2 =====

Atomic Coordinates:

|    |             |             |             |
|----|-------------|-------------|-------------|
| 39 | 0.03106681  | 2.14675248  | -0.00771740 |
| 6  | 3.85322368  | 1.18547532  | -1.21031498 |
| 6  | 3.70833145  | 1.90559244  | 0.00377637  |
| 6  | 2.82028283  | 3.03711848  | -0.00156045 |
| 6  | 3.84597128  | 1.19125250  | 1.22211743  |
| 6  | 4.03869107  | -0.22752593 | 1.22315332  |
| 6  | 4.05341602  | -0.98063572 | 0.01166302  |
| 6  | 4.04592711  | -0.23328987 | -1.20345780 |
| 6  | 3.05380546  | 1.54988103  | 2.38415058  |
| 6  | 2.14987249  | 2.63622714  | 2.35107597  |
| 6  | 2.08083010  | 3.44164223  | 1.15399766  |
| 6  | 0.95168815  | 2.51653733  | 3.10106563  |
| 6  | 2.82246588  | -1.99711716 | 2.41048751  |
| 6  | 3.38530566  | -0.73623920 | 2.40408979  |
| 6  | 2.72124041  | 0.33864791  | 3.08821364  |
| 6  | 1.44348538  | 0.14731635  | 3.69164827  |
| 6  | 0.60149815  | 1.29554473  | 3.75874206  |
| 6  | 2.88753324  | -2.82520239 | -1.19308853 |
| 6  | 3.45694670  | -2.32110635 | 0.01306908  |
| 6  | 2.88034263  | -2.81947358 | 1.21819065  |
| 6  | -0.26589234 | 3.16192298  | 2.65046365  |
| 6  | -0.33016185 | 4.00209275  | 1.48911999  |
| 6  | 0.90547185  | 4.18556640  | 0.73141284  |
| 6  | -1.55170270 | 3.91794768  | 0.71769665  |
| 6  | -1.36667354 | 2.33035412  | 3.08889311  |
| 6  | -3.28578612 | 1.03606976  | 2.36744077  |
| 6  | -2.56699362 | 2.25366420  | 2.33286964  |
| 6  | -2.62855762 | 3.05019628  | 1.13975880  |
| 6  | 1.57904938  | -2.23656432 | 3.09504989  |
| 6  | 0.81813251  | -1.17543131 | 3.66525332  |
| 6  | -0.64402355 | -1.29264244 | 3.66052571  |
| 6  | -1.47473513 | -0.08698231 | 3.68222359  |
| 6  | -0.82960953 | 1.18129012  | 3.75140258  |
| 6  | -2.76366956 | -0.10383675 | 3.07185985  |
| 6  | -1.54732068 | 3.91445143  | -0.75105745 |
| 6  | -0.32119792 | 3.99493286  | -1.51556704 |
| 6  | 0.90989215  | 4.18203411  | -0.75138677 |
| 6  | -0.25001677 | 3.14925823  | -2.67249720 |
| 6  | -2.62165177 | 3.04469462  | -1.17541015 |
| 6  | -3.27157722 | 1.02474941  | -2.39740817 |
| 6  | -2.55298715 | 2.24250626  | -2.36433690 |
| 6  | -1.34818442 | 2.31562923  | -3.11355582 |
| 6  | -4.00439507 | 0.55681017  | 1.20007305  |
| 6  | -3.98225299 | 1.28900843  | -0.01769550 |
| 6  | -3.30263237 | 2.55382362  | -0.01867320 |
| 6  | -3.99714224 | 0.55103240  | -1.23208193 |
| 6  | 0.97021923  | 2.50177843  | -3.11278401 |
| 6  | 2.16390708  | 2.62504193  | -2.35622523 |
| 6  | 2.08773632  | 3.43612954  | -1.16341713 |
| 6  | 3.06800731  | 1.53856467  | -2.37874469 |
| 6  | 0.62393676  | 1.27766451  | -3.76671648 |

|   |             |             |             |
|---|-------------|-------------|-------------|
| 6 | 1.46549329  | 0.12977970  | -3.68914483 |
| 6 | 2.73963129  | 0.32399463  | -3.07901587 |
| 6 | 2.83677968  | -2.00852117 | -2.38960347 |
| 6 | 3.39958991  | -0.74761911 | -2.38584067 |
| 6 | -1.20212610 | -2.47651257 | -3.08798067 |
| 6 | -0.62218342 | -1.31004424 | -3.66363245 |
| 6 | 0.83997619  | -1.19283637 | -3.66019457 |
| 6 | 1.59746452  | -2.25123620 | -3.08042547 |
| 6 | -0.80719050 | 1.16342788  | -3.76736847 |
| 6 | -2.74528678 | -0.11848520 | -3.09327643 |
| 6 | -1.45273407 | -0.10451148 | -3.69601351 |
| 6 | -1.11153954 | -3.88534274 | -1.19945185 |
| 6 | -0.40619151 | -3.44776506 | -2.38929804 |
| 6 | 0.96450378  | -3.33825225 | -2.38597014 |
| 6 | -1.11871120 | -3.87962850 | 1.20573692  |
| 6 | -0.40430056 | -4.14548657 | 0.00588743  |
| 6 | -3.22652387 | -1.28325958 | -2.40253246 |
| 6 | -2.40055805 | -3.24569569 | 1.20300216  |
| 6 | -3.04415205 | -2.84584795 | -0.00507300 |
| 6 | -2.39337069 | -3.25142302 | -1.20737486 |
| 6 | -2.46830891 | -2.43636581 | -2.40339202 |
| 6 | -2.48261643 | -2.42496566 | 2.39466433  |
| 6 | -3.24079588 | -1.27188693 | 2.38380272  |
| 6 | -3.96243666 | -0.87371838 | 1.19973363  |
| 6 | -3.84946337 | -1.62016939 | -0.01038712 |
| 6 | -3.95520747 | -0.87947815 | -1.22469343 |
| 6 | 0.95022660  | -3.32687686 | 2.40200462  |
| 6 | -0.42046590 | -3.43639196 | 2.39767657  |
| 6 | -1.22053891 | -2.46184125 | 3.08697545  |
| 6 | 1.72439382  | -3.65748161 | -1.19194406 |
| 6 | 1.06154105  | -4.02738790 | 0.00997881  |
| 6 | 1.71721898  | -3.65176536 | 1.21406310  |

#

Vibrational frequencies

|       |       |       |       |       |       |       |
|-------|-------|-------|-------|-------|-------|-------|
| freq. | 35.8  | 37.1  | 176.5 | 208.3 | 211.9 | 214.4 |
| freq. | 220.0 | 249.0 | 270.4 | 271.9 | 273.4 | 275.1 |
| freq. | 286.3 | 295.1 | 323.6 | 323.8 | 328.2 | 339.8 |
| freq. | 340.3 | 344.6 | 348.6 | 352.1 | 353.1 | 356.6 |
| freq. | 361.1 | 362.1 | 375.0 | 378.8 | 395.7 | 412.3 |
| freq. | 418.0 | 422.8 | 431.1 | 437.4 | 442.9 | 448.0 |
| freq. | 455.0 | 464.9 | 465.0 | 472.4 | 477.6 | 479.7 |
| freq. | 482.6 | 487.9 | 491.0 | 492.1 | 495.7 | 497.9 |
| freq. | 499.1 | 505.0 | 510.4 | 511.0 | 513.4 | 517.4 |
| freq. | 519.2 | 522.8 | 532.8 | 553.8 | 567.5 | 569.8 |
| freq. | 583.8 | 588.5 | 588.8 | 591.7 | 611.4 | 613.3 |
| freq. | 615.4 | 622.9 | 624.8 | 626.3 | 631.1 | 639.4 |
| freq. | 644.3 | 646.9 | 649.6 | 652.1 | 652.6 | 659.8 |
| freq. | 664.6 | 670.1 | 671.1 | 673.0 | 681.5 | 683.3 |
| freq. | 686.0 | 687.1 | 688.2 | 690.2 | 691.9 | 699.8 |
| freq. | 711.8 | 712.5 | 714.7 | 717.0 | 718.1 | 724.9 |
| freq. | 725.3 | 728.4 | 729.1 | 733.5 | 738.3 | 742.3 |
| freq. | 745.4 | 751.0 | 754.6 | 755.6 | 760.6 | 765.8 |
| freq. | 766.8 | 768.1 | 772.0 | 772.6 | 776.7 | 777.3 |

|       |        |        |        |        |        |        |
|-------|--------|--------|--------|--------|--------|--------|
| freq. | 790.0  | 790.7  | 792.0  | 792.8  | 793.0  | 793.4  |
| freq. | 796.9  | 798.4  | 802.1  | 824.0  | 827.3  | 836.8  |
| freq. | 847.7  | 858.7  | 861.8  | 867.3  | 868.6  | 874.6  |
| freq. | 875.1  | 877.7  | 886.7  | 920.5  | 1002.4 | 1005.6 |
| freq. | 1006.9 | 1014.5 | 1015.7 | 1020.7 | 1025.0 | 1031.9 |
| freq. | 1036.0 | 1108.1 | 1115.0 | 1115.3 | 1120.5 | 1124.7 |
| freq. | 1133.7 | 1136.0 | 1139.3 | 1156.9 | 1158.7 | 1160.0 |
| freq. | 1175.5 | 1177.2 | 1186.1 | 1190.3 | 1198.5 | 1201.8 |
| freq. | 1206.3 | 1211.4 | 1213.0 | 1224.0 | 1228.0 | 1229.5 |
| freq. | 1239.7 | 1245.1 | 1254.7 | 1256.6 | 1261.0 | 1264.5 |
| freq. | 1265.4 | 1269.4 | 1270.6 | 1273.7 | 1279.0 | 1293.3 |
| freq. | 1305.9 | 1306.0 | 1308.2 | 1315.3 | 1315.3 | 1317.9 |
| freq. | 1319.1 | 1325.5 | 1328.3 | 1330.6 | 1332.9 | 1333.0 |
| freq. | 1337.6 | 1340.0 | 1350.0 | 1350.7 | 1353.2 | 1359.0 |
| freq. | 1363.4 | 1365.7 | 1367.4 | 1369.0 | 1375.4 | 1378.0 |
| freq. | 1378.8 | 1379.5 | 1394.8 | 1399.5 | 1405.2 | 1409.9 |
| freq. | 1412.7 | 1416.5 | 1421.2 | 1422.7 | 1427.1 | 1430.9 |
| freq. | 1432.6 | 1433.3 | 1440.4 | 1443.4 | 1450.6 | 1454.9 |
| freq. | 1461.7 | 1469.0 | 1475.2 | 1475.9 | 1482.2 | 1489.2 |
| freq. | 1490.4 | 1491.8 | 1507.6 | 1509.7 | 1510.7 | 1514.4 |
| freq. | 1515.8 | 1516.0 | 1517.2 | 1561.5 | 1572.3 | 1577.4 |
| freq. | 1578.9 | 1603.3 | 1610.5 |        |        |        |

---

---

3. ===== La@C<sub>82</sub> scalar relativistic PBE/L2//PBE/L2 =====  
Atomic Coordinates:

|    |             |             |             |
|----|-------------|-------------|-------------|
| 57 | -0.03238721 | 1.95095813  | -0.00743242 |
| 6  | 3.85599945  | 1.18841624  | -1.21016969 |
| 6  | 3.71444118  | 1.91124559  | 0.00378899  |
| 6  | 2.83541809  | 3.05085587  | -0.00155714 |
| 6  | 3.84882112  | 1.19427170  | 1.22203760  |
| 6  | 4.03914847  | -0.22522730 | 1.22261078  |
| 6  | 4.05409679  | -0.97899467 | 0.01167658  |
| 6  | 4.04638448  | -0.23103904 | -1.20290554 |
| 6  | 3.05610480  | 1.55272743  | 2.38446133  |
| 6  | 2.15380408  | 2.64172893  | 2.35087996  |
| 6  | 2.09185538  | 3.44773961  | 1.15510623  |
| 6  | 0.95266117  | 2.52269597  | 3.09985718  |
| 6  | 2.82250651  | -1.99529871 | 2.41007353  |
| 6  | 3.38546681  | -0.73410852 | 2.40310316  |
| 6  | 2.72197414  | 0.34126704  | 3.08719494  |
| 6  | 1.44355187  | 0.14992132  | 3.68912381  |
| 6  | 0.60170514  | 1.29825483  | 3.75453829  |
| 6  | 2.88762049  | -2.82383786 | -1.19297492 |
| 6  | 3.45725659  | -2.31943955 | 0.01306221  |
| 6  | 2.88041877  | -2.81806749 | 1.21805239  |
| 6  | -0.26645834 | 3.17261260  | 2.65911325  |
| 6  | -0.33017270 | 4.00209784  | 1.48988768  |
| 6  | 0.90247885  | 4.16174470  | 0.72888627  |
| 6  | -1.55458092 | 3.92639123  | 0.71874042  |
| 6  | -1.36747860 | 2.33612321  | 3.09211256  |
| 6  | -3.28522130 | 1.03927638  | 2.36743716  |
| 6  | -2.56804910 | 2.25838953  | 2.33495625  |
| 6  | -2.63112597 | 3.05728760  | 1.14076371  |
| 6  | 1.57948466  | -2.23481524 | 3.09449808  |
| 6  | 0.81827608  | -1.17307018 | 3.66384982  |
| 6  | -0.64359770 | -1.29065453 | 3.65943744  |
| 6  | -1.47390800 | -0.08503958 | 3.68065366  |
| 6  | -0.82851523 | 1.18382884  | 3.74976111  |
| 6  | -2.76316533 | -0.10177981 | 3.07165024  |
| 6  | -1.55015204 | 3.92286565  | -0.75208608 |
| 6  | -0.32120489 | 3.99499743  | -1.51632145 |
| 6  | 0.90689989  | 4.15822741  | -0.74879048 |
| 6  | -0.25057119 | 3.15982942  | -2.68107907 |
| 6  | -2.62413372 | 3.05171006  | -1.17642852 |
| 6  | -3.27104532 | 1.02795346  | -2.39742176 |
| 6  | -2.55407085 | 2.24722474  | -2.36648135 |
| 6  | -1.34899108 | 2.32134816  | -3.11678300 |
| 6  | -4.00346437 | 0.55950265  | 1.20016756  |
| 6  | -3.98125056 | 1.29123922  | -0.01770397 |
| 6  | -3.30331349 | 2.55825052  | -0.01868778 |
| 6  | -3.99621421 | 0.55370329  | -1.23219155 |
| 6  | 0.97113858  | 2.50788469  | -3.11147124 |
| 6  | 2.16778925  | 2.63043768  | -2.35595786 |
| 6  | 2.09875238  | 3.44217773  | -1.16449359 |
| 6  | 3.07017940  | 1.54122310  | -2.37893547 |

|   |             |             |             |
|---|-------------|-------------|-------------|
| 6 | 0.62410928  | 1.28039153  | -3.76250417 |
| 6 | 1.46551682  | 0.13237752  | -3.68665422 |
| 6 | 2.74031916  | 0.32651618  | -3.07798746 |
| 6 | 2.83685385  | -2.00677682 | -2.38924328 |
| 6 | 3.39976490  | -0.74557089 | -2.38486268 |
| 6 | -1.20221502 | -2.47540273 | -3.08770534 |
| 6 | -0.62177241 | -1.30806346 | -3.66256151 |
| 6 | 0.84010271  | -1.19049010 | -3.65884192 |
| 6 | 1.59791276  | -2.24952622 | -3.07993859 |
| 6 | -0.80612110 | 1.16596465  | -3.76574290 |
| 6 | -2.74481027 | -0.11642136 | -3.09311320 |
| 6 | -1.45192821 | -0.10256846 | -3.69447336 |
| 6 | -1.11159283 | -3.88511406 | -1.19963067 |
| 6 | -0.40612966 | -3.44692695 | -2.38938301 |
| 6 | 0.96473073  | -3.33686178 | -2.38584236 |
| 6 | -1.11875396 | -3.87938143 | 1.20587875  |
| 6 | -0.40430795 | -4.14525548 | 0.00587072  |
| 6 | -3.22598676 | -1.28121537 | -2.40250134 |
| 6 | -2.40027054 | -3.24467886 | 1.20306199  |
| 6 | -3.04349784 | -2.84450891 | -0.00508630 |
| 6 | -2.39309422 | -3.25040742 | -1.20747547 |
| 6 | -2.46790882 | -2.43509283 | -2.40359964 |
| 6 | -2.48221106 | -2.42368627 | 2.39482820  |
| 6 | -3.24025213 | -1.26984162 | 2.38371999  |
| 6 | -3.96141472 | -0.87156914 | 1.19974007  |
| 6 | -3.84840066 | -1.61797950 | -0.01039596 |
| 6 | -3.95418989 | -0.87735542 | -1.22473505 |
| 6 | 0.95045059  | -3.32546193 | 2.40183358  |
| 6 | -0.42040301 | -3.43552681 | 2.39772423  |
| 6 | -1.22061623 | -2.46071010 | 3.08665706  |
| 6 | 1.72476102  | -3.65657598 | -1.19193408 |
| 6 | 1.06184049  | -4.02692823 | 0.00996657  |
| 6 | 1.71758284  | -3.65082907 | 1.21402203  |

#

Vibrational frequencies

|       |       |       |       |       |       |       |
|-------|-------|-------|-------|-------|-------|-------|
| freq. | 23.6  | 24.0  | 157.1 | 208.3 | 212.3 | 214.4 |
| freq. | 220.2 | 243.1 | 271.0 | 273.8 | 274.5 | 276.3 |
| freq. | 286.0 | 294.3 | 316.5 | 323.9 | 328.2 | 339.9 |
| freq. | 341.7 | 346.4 | 348.5 | 354.2 | 355.8 | 357.4 |
| freq. | 362.6 | 364.6 | 374.3 | 377.3 | 394.1 | 414.3 |
| freq. | 422.0 | 425.7 | 432.9 | 439.7 | 444.6 | 452.7 |
| freq. | 457.2 | 463.5 | 464.7 | 473.3 | 478.2 | 480.5 |
| freq. | 483.6 | 488.2 | 491.0 | 493.9 | 495.5 | 498.8 |
| freq. | 499.3 | 504.8 | 510.8 | 512.6 | 513.4 | 517.1 |
| freq. | 519.9 | 522.4 | 529.5 | 545.9 | 565.8 | 568.1 |
| freq. | 583.0 | 588.4 | 588.5 | 591.4 | 611.4 | 613.4 |
| freq. | 615.2 | 623.0 | 625.6 | 626.5 | 631.9 | 639.6 |
| freq. | 644.5 | 646.6 | 650.1 | 652.1 | 653.0 | 659.3 |
| freq. | 663.7 | 668.1 | 669.8 | 673.2 | 681.2 | 683.2 |
| freq. | 685.5 | 686.1 | 687.6 | 689.9 | 691.7 | 700.1 |
| freq. | 712.1 | 714.7 | 715.2 | 717.2 | 717.6 | 725.2 |
| freq. | 726.2 | 726.8 | 727.9 | 732.2 | 737.8 | 742.2 |
| freq. | 742.4 | 750.6 | 753.1 | 755.4 | 760.8 | 764.9 |



|       |        |        |        |        |        |        |
|-------|--------|--------|--------|--------|--------|--------|
| freq. | 766.5  | 768.4  | 770.8  | 772.4  | 776.7  | 777.4  |
| freq. | 790.1  | 790.9  | 792.1  | 792.3  | 793.1  | 793.2  |
| freq. | 796.7  | 798.9  | 802.5  | 824.2  | 826.2  | 836.6  |
| freq. | 847.8  | 858.1  | 861.7  | 866.8  | 868.9  | 874.6  |
| freq. | 875.1  | 876.9  | 886.3  | 920.4  | 1002.8 | 1005.4 |
| freq. | 1006.3 | 1014.9 | 1015.9 | 1019.9 | 1025.1 | 1031.1 |
| freq. | 1035.6 | 1110.1 | 1113.8 | 1115.4 | 1120.6 | 1124.9 |
| freq. | 1133.8 | 1135.3 | 1138.9 | 1157.2 | 1159.5 | 1160.9 |
| freq. | 1175.3 | 1176.5 | 1185.3 | 1189.2 | 1197.9 | 1201.7 |
| freq. | 1206.1 | 1210.6 | 1213.1 | 1222.9 | 1227.3 | 1229.5 |
| freq. | 1240.8 | 1244.4 | 1254.3 | 1256.8 | 1261.3 | 1263.6 |
| freq. | 1266.5 | 1269.2 | 1269.5 | 1273.2 | 1278.4 | 1293.2 |
| freq. | 1305.6 | 1306.5 | 1307.2 | 1315.2 | 1316.4 | 1317.6 |
| freq. | 1320.9 | 1326.5 | 1328.0 | 1329.4 | 1333.6 | 1334.8 |
| freq. | 1337.2 | 1339.7 | 1350.0 | 1350.4 | 1352.9 | 1356.0 |
| freq. | 1362.3 | 1362.5 | 1364.1 | 1366.4 | 1374.7 | 1376.9 |
| freq. | 1378.1 | 1378.7 | 1393.6 | 1397.1 | 1404.8 | 1408.2 |
| freq. | 1412.6 | 1416.3 | 1419.9 | 1421.3 | 1427.1 | 1428.3 |
| freq. | 1430.4 | 1431.7 | 1438.9 | 1442.7 | 1449.4 | 1453.6 |
| freq. | 1460.1 | 1467.9 | 1474.4 | 1475.1 | 1481.3 | 1487.5 |
| freq. | 1489.0 | 1490.9 | 1506.7 | 1507.9 | 1508.5 | 1513.2 |
| freq. | 1514.5 | 1515.1 | 1516.3 | 1560.3 | 1571.5 | 1575.8 |
| freq. | 1577.7 | 1602.4 | 1609.8 |        |        |        |

---

4. ===== Sc@C<sub>82</sub> scalar relativistic PBE/r3zv//PBE/r3zv

=====

Atomic Coordinates:

|    |             |             |             |
|----|-------------|-------------|-------------|
| 21 | 0.08132870  | 2.32260335  | -0.00803229 |
| 6  | 3.84527178  | 1.18189954  | -1.20885284 |
| 6  | 3.69905132  | 1.90024167  | 0.00375744  |
| 6  | 2.80339092  | 3.02083697  | -0.00157359 |
| 6  | 3.83801794  | 1.18766617  | 1.22061528  |
| 6  | 4.03600767  | -0.22879275 | 1.22289137  |
| 6  | 4.04544875  | -0.97989347 | 0.01163222  |
| 6  | 4.04324728  | -0.23455121 | -1.20322088 |
| 6  | 3.04878367  | 1.54652646  | 2.38192218  |
| 6  | 2.14365261  | 2.62894854  | 2.34853372  |
| 6  | 2.06733460  | 3.42920684  | 1.15095339  |
| 6  | 0.95091928  | 2.50933745  | 3.10056200  |
| 6  | 2.82101992  | -1.99672178 | 2.40916367  |
| 6  | 3.38392262  | -0.73714464 | 2.40410069  |
| 6  | 2.71894154  | 0.33630352  | 3.08715151  |
| 6  | 1.44138351  | 0.14486084  | 3.68723629  |
| 6  | 0.60187524  | 1.29248158  | 3.75986737  |
| 6  | 2.88538845  | -2.82300796 | -1.19233534 |
| 6  | 3.45306781  | -2.31914460 | 0.01305234  |
| 6  | 2.87819738  | -2.81730618 | 1.21741184  |
| 6  | -0.26437037 | 3.14803998  | 2.64055794  |
| 6  | -0.32901805 | 3.99308127  | 1.48592751  |
| 6  | 0.90607290  | 4.19976066  | 0.73285941  |
| 6  | -1.54561926 | 3.90275208  | 0.71518241  |
| 6  | -1.36425498 | 2.32331709  | 3.08197482  |
| 6  | -3.28336156 | 1.03300100  | 2.36504573  |
| 6  | -2.56222622 | 2.24739953  | 2.32638872  |
| 6  | -2.62529885 | 3.04135806  | 1.13758598  |
| 6  | 1.57787361  | -2.23626051 | 3.09361206  |
| 6  | 0.81717417  | -1.17534081 | 3.66066874  |
| 6  | -0.64307178 | -1.29202078 | 3.65511863  |
| 6  | -1.47257168 | -0.08818458 | 3.67687212  |
| 6  | -0.82960238 | 1.17771727  | 3.74872277  |
| 6  | -2.76189287 | -0.10508549 | 3.06915139  |
| 6  | -1.54125323 | 3.89927497  | -0.74843737 |
| 6  | -0.32007519 | 3.98595833  | -1.51233229 |
| 6  | 0.91050459  | 4.19623158  | -0.75290156 |
| 6  | -0.24855368 | 3.13544327  | -2.66252976 |
| 6  | -2.61840711 | 3.03586889  | -1.17317465 |
| 6  | -3.26916474 | 1.02169405  | -2.39498102 |
| 6  | -2.54825613 | 2.23627281  | -2.35779420 |
| 6  | -1.34579827 | 2.30861738  | -3.10657403 |
| 6  | -4.00113274 | 0.55445455  | 1.19843735  |
| 6  | -3.98070549 | 1.28728260  | -0.01768636 |
| 6  | -3.30197869 | 2.54939171  | -0.01866074 |
| 6  | -3.99388818 | 0.54868499  | -1.23041436 |
| 6  | 0.96944831  | 2.49458152  | -3.11223827 |
| 6  | 2.15767793  | 2.61778273  | -2.35368751 |
| 6  | 2.07422779  | 3.42371796  | -1.16039725 |
| 6  | 3.06297854  | 1.53522878  | -2.37653487 |

|   |             |             |             |
|---|-------------|-------------|-------------|
| 6 | 0.62432441  | 1.27460248  | -3.76782522 |
| 6 | 1.46336458  | 0.12735103  | -3.68473185 |
| 6 | 2.73732409  | 0.32166610  | -3.07795980 |
| 6 | 2.83532316  | -2.00810974 | -2.38828934 |
| 6 | 3.39818691  | -0.74851266 | -2.38585037 |
| 6 | -1.20097271 | -2.47537153 | -3.08623720 |
| 6 | -0.62126128 | -1.30939381 | -3.65822270 |
| 6 | 0.83899202  | -1.19271950 | -3.65561394 |
| 6 | 1.59627867  | -2.25091761 | -3.07898519 |
| 6 | -0.80719487 | 1.15987143  | -3.76467097 |
| 6 | -2.74352186 | -0.11971703 | -3.09054872 |
| 6 | -1.45059883 | -0.10568466 | -3.69064200 |
| 6 | -1.11026592 | -3.88199671 | -1.19876001 |
| 6 | -0.40599223 | -3.44560584 | -2.38755908 |
| 6 | 0.96426104  | -3.33664366 | -2.38461030 |
| 6 | -1.11743644 | -3.87629043 | 1.20504465  |
| 6 | -0.40329369 | -4.13897652 | 0.00588005  |
| 6 | -3.22542562 | -1.28350757 | -2.40110386 |
| 6 | -2.39878724 | -3.24269774 | 1.20209584  |
| 6 | -3.04128908 | -2.84275566 | -0.00507058 |
| 6 | -2.39160516 | -3.24841792 | -1.20646905 |
| 6 | -2.46686080 | -2.43495806 | -2.40114282 |
| 6 | -2.48115905 | -2.42357261 | 2.39241960  |
| 6 | -3.23969216 | -1.27214431 | 2.38238148  |
| 6 | -3.96160832 | -0.87474187 | 1.19899898  |
| 6 | -3.84435097 | -1.61921849 | -0.01037397 |
| 6 | -3.95438099 | -0.88049814 | -1.22394930 |
| 6 | 0.94998979  | -3.32528060 | 2.40065141  |
| 6 | -0.42025795 | -3.43424049 | 2.39593344  |
| 6 | -1.21937989 | -2.46071003 | 3.08523528  |
| 6 | 1.72306977  | -3.65507086 | -1.19141052 |
| 6 | 1.05986036  | -4.02120258 | 0.00996726  |
| 6 | 1.71588314  | -3.64934559 | 1.21352125  |

#

Vibrational frequencies

|       |       |       |       |       |       |       |
|-------|-------|-------|-------|-------|-------|-------|
| freq. | 59.4  | 65.3  | 197.1 | 209.6 | 211.4 | 214.6 |
| freq. | 219.9 | 262.5 | 269.6 | 270.4 | 272.7 | 274.3 |
| freq. | 285.8 | 295.2 | 322.7 | 327.5 | 336.4 | 338.8 |
| freq. | 338.9 | 341.2 | 347.6 | 348.8 | 350.4 | 353.7 |
| freq. | 358.1 | 359.3 | 374.3 | 377.7 | 402.8 | 404.3 |
| freq. | 407.7 | 422.2 | 424.4 | 430.3 | 436.7 | 442.5 |
| freq. | 446.6 | 458.2 | 461.1 | 465.7 | 469.1 | 474.7 |
| freq. | 475.7 | 483.9 | 485.2 | 486.5 | 490.1 | 493.2 |
| freq. | 496.6 | 499.7 | 501.0 | 505.3 | 506.8 | 511.4 |
| freq. | 517.8 | 521.3 | 531.1 | 547.8 | 556.9 | 558.5 |
| freq. | 584.1 | 588.9 | 590.0 | 592.2 | 595.9 | 604.6 |
| freq. | 606.9 | 612.0 | 612.6 | 616.6 | 623.1 | 624.3 |
| freq. | 625.8 | 627.4 | 630.5 | 630.7 | 637.5 | 641.4 |
| freq. | 643.3 | 645.9 | 648.2 | 653.5 | 656.1 | 657.3 |
| freq. | 657.9 | 660.5 | 664.9 | 665.7 | 667.1 | 669.0 |
| freq. | 671.9 | 672.7 | 674.2 | 675.7 | 676.0 | 676.3 |
| freq. | 678.3 | 680.4 | 680.9 | 681.0 | 684.7 | 686.8 |
| freq. | 687.7 | 688.2 | 690.3 | 692.8 | 693.8 | 694.2 |

|       |        |        |        |        |        |        |
|-------|--------|--------|--------|--------|--------|--------|
| freq. | 698.2  | 700.3  | 710.6  | 713.3  | 715.6  | 725.9  |
| freq. | 736.3  | 738.2  | 744.2  | 748.8  | 757.2  | 773.8  |
| freq. | 774.8  | 789.6  | 790.0  | 824.7  | 829.4  | 835.4  |
| freq. | 849.6  | 860.1  | 863.1  | 867.5  | 869.6  | 872.6  |
| freq. | 876.3  | 880.2  | 889.0  | 913.2  | 1005.0 | 1007.7 |
| freq. | 1010.5 | 1017.7 | 1018.1 | 1024.5 | 1026.7 | 1035.7 |
| freq. | 1038.5 | 1110.4 | 1117.3 | 1120.9 | 1123.9 | 1130.0 |
| freq. | 1140.0 | 1140.3 | 1146.1 | 1160.9 | 1163.7 | 1165.7 |
| freq. | 1181.3 | 1184.7 | 1191.8 | 1195.9 | 1204.8 | 1206.3 |
| freq. | 1214.9 | 1218.4 | 1221.9 | 1233.7 | 1235.0 | 1237.6 |
| freq. | 1246.0 | 1253.7 | 1260.1 | 1261.4 | 1267.1 | 1272.4 |
| freq. | 1272.8 | 1276.0 | 1277.3 | 1281.8 | 1287.3 | 1298.8 |
| freq. | 1315.0 | 1316.3 | 1318.2 | 1323.1 | 1323.8 | 1325.6 |
| freq. | 1327.8 | 1332.4 | 1338.5 | 1339.7 | 1340.9 | 1345.0 |
| freq. | 1351.8 | 1355.0 | 1363.9 | 1365.8 | 1368.2 | 1374.7 |
| freq. | 1378.3 | 1380.7 | 1382.5 | 1385.7 | 1390.2 | 1391.6 |
| freq. | 1391.6 | 1395.2 | 1412.0 | 1415.4 | 1419.6 | 1422.9 |
| freq. | 1424.5 | 1429.9 | 1432.9 | 1437.4 | 1437.5 | 1443.6 |
| freq. | 1447.8 | 1449.3 | 1454.8 | 1457.4 | 1466.2 | 1469.8 |
| freq. | 1475.1 | 1483.2 | 1486.5 | 1487.9 | 1496.4 | 1503.2 |
| freq. | 1503.3 | 1508.6 | 1521.3 | 1524.0 | 1525.8 | 1527.9 |
| freq. | 1529.1 | 1530.3 | 1532.3 | 1578.5 | 1588.6 | 1595.0 |
| freq. | 1595.8 | 1620.2 | 1626.6 |        |        |        |

---

5. ===== Y@C<sub>82</sub> scalar relativistic PBE/r3zv//PBE/r3zv

=====

Atomic Coordinates:

|    |             |             |             |
|----|-------------|-------------|-------------|
| 39 | 0.03828010  | 2.16482095  | -0.00774515 |
| 6  | 3.84619897  | 1.18339131  | -1.20833715 |
| 6  | 3.70048271  | 1.90285538  | 0.00375838  |
| 6  | 2.81011600  | 3.03017102  | -0.00157595 |
| 6  | 3.83895437  | 1.18916149  | 1.22010613  |
| 6  | 4.03605318  | -0.22842383 | 1.22241207  |
| 6  | 4.04498610  | -0.97990182 | 0.01163461  |
| 6  | 4.04328700  | -0.23418585 | -1.20273084 |
| 6  | 3.04947086  | 1.54824461  | 2.38090946  |
| 6  | 2.14602529  | 2.63339885  | 2.34735432  |
| 6  | 2.07510912  | 3.43917092  | 1.15254371  |
| 6  | 0.95048615  | 2.51326162  | 3.09648761  |
| 6  | 2.82091802  | -1.99696497 | 2.40887129  |
| 6  | 3.38328453  | -0.73641827 | 2.40254971  |
| 6  | 2.71826051  | 0.33747303  | 3.08488137  |
| 6  | 1.44038633  | 0.14603019  | 3.68362954  |
| 6  | 0.60099485  | 1.29388155  | 3.75573978  |
| 6  | 2.88533457  | -2.82368466 | -1.19235749 |
| 6  | 3.45294436  | -2.31954899 | 0.01305116  |
| 6  | 2.87814736  | -2.81796168 | 1.21743519  |
| 6  | -0.26499018 | 3.15659097  | 2.64280947  |
| 6  | -0.33034344 | 4.00750277  | 1.48977777  |
| 6  | 0.90584116  | 4.19623133  | 0.73268422  |
| 6  | -1.55127576 | 3.92316303  | 0.71797515  |
| 6  | -1.36444193 | 2.32708540  | 3.08348601  |
| 6  | -3.28211060 | 1.03477764  | 2.36450589  |
| 6  | -2.56238368 | 2.25067574  | 2.32834585  |
| 6  | -2.62166951 | 3.04616957  | 1.13768245  |
| 6  | 1.57832598  | -2.23659290 | 3.09305884  |
| 6  | 0.81665756  | -1.17455747 | 3.65760738  |
| 6  | -0.64289987 | -1.29147630 | 3.65261195  |
| 6  | -1.47168311 | -0.08769854 | 3.67420588  |
| 6  | -0.82866736 | 1.17960974  | 3.74778068  |
| 6  | -2.76100055 | -0.10468009 | 3.06854237  |
| 6  | -1.54689213 | 3.91966481  | -0.75137585 |
| 6  | -0.32137365 | 4.00034251  | -1.51626312 |
| 6  | 0.91026918  | 4.19269065  | -0.75271133 |
| 6  | -0.24915626 | 3.14397345  | -2.66483360 |
| 6  | -2.61479504 | 3.04069271  | -1.17328492 |
| 6  | -3.26791355 | 1.02348141  | -2.39443399 |
| 6  | -2.54840476 | 2.23954394  | -2.35975600 |
| 6  | -1.34597193 | 2.31236745  | -3.10810230 |
| 6  | -3.99891315 | 0.55555788  | 1.19845358  |
| 6  | -3.97547158 | 1.28696737  | -0.01766866 |
| 6  | -3.29441659 | 2.54909373  | -0.01863513 |
| 6  | -3.99166888 | 0.54979303  | -1.23041416 |
| 6  | 0.96899216  | 2.49851335  | -3.10818477 |
| 6  | 2.16004111  | 2.62223278  | -2.35251545 |
| 6  | 2.08200898  | 3.43366726  | -1.16198815 |
| 6  | 3.06365520  | 1.53694417  | -2.37552193 |

|   |             |             |             |
|---|-------------|-------------|-------------|
| 6 | 0.62342129  | 1.27601256  | -3.76369956 |
| 6 | 1.46234841  | 0.12852618  | -3.68112665 |
| 6 | 2.73662957  | 0.32283865  | -3.07569296 |
| 6 | 2.83522649  | -2.00835885 | -2.38800068 |
| 6 | 3.39756095  | -0.74778756 | -2.38431292 |
| 6 | -1.20167363 | -2.47648589 | -3.08611394 |
| 6 | -0.62110280 | -1.30884023 | -3.65572641 |
| 6 | 0.83845945  | -1.19192956 | -3.65257329 |
| 6 | 1.59673835  | -2.25125327 | -3.07844368 |
| 6 | -0.80626388 | 1.16176544  | -3.76372302 |
| 6 | -2.74263244 | -0.11930562 | -3.08993480 |
| 6 | -1.44972529 | -0.10518521 | -3.68797555 |
| 6 | -1.11052501 | -3.88412357 | -1.19897707 |
| 6 | -0.40609354 | -3.44679137 | -2.38768056 |
| 6 | 0.96421140  | -3.33757121 | -2.38452231 |
| 6 | -1.11769686 | -3.87841267 | 1.20526180  |
| 6 | -0.40351361 | -4.14058904 | 0.00587748  |
| 6 | -3.22491927 | -1.28332297 | -2.40094419 |
| 6 | -2.39885831 | -3.24385980 | 1.20224260  |
| 6 | -3.04073022 | -2.84353166 | -0.00506350 |
| 6 | -2.39167268 | -3.24958455 | -1.20661137 |
| 6 | -2.46705241 | -2.43606895 | -2.40172524 |
| 6 | -2.48134989 | -2.42467668 | 2.39300591  |
| 6 | -3.23918182 | -1.27196016 | 2.38222867  |
| 6 | -3.96047154 | -0.87451671 | 1.19914683  |
| 6 | -3.84237680 | -1.61851423 | -0.01036356 |
| 6 | -3.95324753 | -0.88027187 | -1.22408132 |
| 6 | 0.94993731  | -3.32620411 | 2.40054775  |
| 6 | -0.42036330 | -3.43542866 | 2.39605159  |
| 6 | -1.22007795 | -2.46182200 | 3.08510913  |
| 6 | 1.72320242  | -3.65668843 | -1.19154780 |
| 6 | 1.05992742  | -4.02261975 | 0.00996179  |
| 6 | 1.71602771  | -3.65097648 | 1.21365085  |

#

Vibrational frequencies

|       |       |       |       |       |       |       |
|-------|-------|-------|-------|-------|-------|-------|
| freq. | 34.0  | 39.4  | 178.5 | 207.9 | 211.6 | 214.9 |
| freq. | 220.5 | 250.1 | 269.7 | 269.7 | 272.9 | 274.3 |
| freq. | 286.1 | 295.3 | 322.8 | 324.6 | 327.6 | 337.8 |
| freq. | 339.0 | 342.2 | 347.7 | 348.5 | 349.3 | 353.2 |
| freq. | 358.2 | 358.5 | 372.4 | 376.8 | 395.6 | 402.0 |
| freq. | 409.6 | 419.1 | 421.1 | 428.2 | 435.9 | 440.4 |
| freq. | 446.1 | 454.4 | 458.5 | 464.1 | 465.4 | 474.1 |
| freq. | 474.2 | 482.5 | 482.8 | 484.4 | 489.2 | 492.7 |
| freq. | 496.8 | 497.3 | 499.0 | 504.9 | 505.9 | 511.3 |
| freq. | 517.4 | 521.8 | 530.3 | 542.7 | 553.0 | 557.3 |
| freq. | 571.0 | 588.4 | 589.5 | 591.2 | 596.0 | 601.5 |
| freq. | 603.7 | 611.4 | 612.2 | 617.3 | 620.5 | 621.6 |
| freq. | 624.4 | 624.5 | 625.9 | 627.8 | 628.8 | 638.6 |
| freq. | 643.2 | 644.4 | 646.7 | 648.0 | 653.7 | 654.5 |
| freq. | 654.7 | 658.1 | 663.6 | 666.1 | 666.3 | 667.0 |
| freq. | 667.7 | 669.2 | 671.1 | 672.4 | 673.3 | 674.3 |
| freq. | 675.0 | 677.9 | 679.2 | 679.9 | 681.3 | 682.4 |
| freq. | 682.6 | 686.4 | 687.1 | 688.1 | 690.9 | 691.7 |

|       |        |        |        |        |        |        |
|-------|--------|--------|--------|--------|--------|--------|
| freq. | 692.6  | 697.1  | 711.9  | 717.1  | 718.2  | 729.6  |
| freq. | 736.2  | 739.7  | 745.0  | 752.1  | 768.2  | 773.5  |
| freq. | 775.1  | 789.5  | 789.8  | 824.5  | 827.5  | 834.8  |
| freq. | 849.1  | 859.4  | 863.3  | 867.8  | 868.8  | 873.2  |
| freq. | 876.8  | 878.0  | 887.4  | 913.1  | 1002.8 | 1007.1 |
| freq. | 1008.9 | 1016.9 | 1017.9 | 1023.3 | 1026.7 | 1034.8 |
| freq. | 1037.7 | 1109.7 | 1116.8 | 1117.9 | 1123.6 | 1129.2 |
| freq. | 1138.9 | 1139.0 | 1144.3 | 1160.7 | 1162.8 | 1163.8 |
| freq. | 1181.6 | 1183.2 | 1190.6 | 1195.0 | 1203.1 | 1205.2 |
| freq. | 1214.2 | 1215.2 | 1220.8 | 1232.0 | 1233.1 | 1237.0 |
| freq. | 1245.4 | 1252.8 | 1259.7 | 1260.9 | 1267.1 | 1271.5 |
| freq. | 1272.9 | 1275.8 | 1276.5 | 1281.1 | 1285.3 | 1297.7 |
| freq. | 1311.3 | 1315.1 | 1317.4 | 1322.4 | 1322.8 | 1323.8 |
| freq. | 1325.5 | 1331.8 | 1337.2 | 1338.3 | 1338.9 | 1344.0 |
| freq. | 1350.8 | 1354.6 | 1361.5 | 1365.3 | 1367.2 | 1367.3 |
| freq. | 1373.6 | 1376.4 | 1378.5 | 1383.2 | 1388.6 | 1390.0 |
| freq. | 1391.1 | 1393.5 | 1410.8 | 1413.0 | 1417.2 | 1420.8 |
| freq. | 1422.9 | 1429.1 | 1430.7 | 1436.4 | 1437.1 | 1440.5 |
| freq. | 1445.0 | 1446.9 | 1452.4 | 1457.0 | 1464.2 | 1467.1 |
| freq. | 1473.6 | 1482.1 | 1485.2 | 1486.3 | 1496.0 | 1501.5 |
| freq. | 1501.7 | 1506.7 | 1520.6 | 1524.1 | 1524.7 | 1526.7 |
| freq. | 1527.9 | 1529.5 | 1530.8 | 1576.4 | 1587.1 | 1591.8 |
| freq. | 1593.3 | 1618.6 | 1625.1 |        |        |        |

6. ===== Sc@C<sub>82</sub> non-relativistic PBE/n3zv//PBE/n3zv

=====

Atomic Coordinates:

|    |             |             |             |
|----|-------------|-------------|-------------|
| 21 | 0.07874566  | 2.32051158  | -0.00803640 |
| 6  | 3.84618551  | 1.18223806  | -1.20913883 |
| 6  | 3.70020917  | 1.90083352  | 0.00376252  |
| 6  | 2.80464502  | 3.02173589  | -0.00157069 |
| 6  | 3.83893742  | 1.18801146  | 1.22091393  |
| 6  | 4.03676500  | -0.22872295 | 1.22313391  |
| 6  | 4.04621774  | -0.97998657 | 0.01163940  |
| 6  | 4.04400250  | -0.23448808 | -1.20344587 |
| 6  | 3.04958821  | 1.54691619  | 2.38255936  |
| 6  | 2.14419524  | 2.62949738  | 2.34906266  |
| 6  | 2.06805873  | 3.42952381  | 1.15118904  |
| 6  | 0.95113315  | 2.50995789  | 3.10124997  |
| 6  | 2.82154167  | -1.99699127 | 2.40958020  |
| 6  | 3.38456424  | -0.73718774 | 2.40455765  |
| 6  | 2.71955654  | 0.33647005  | 3.08781531  |
| 6  | 1.44169019  | 0.14499172  | 3.68794315  |
| 6  | 0.60204171  | 1.29282844  | 3.76059777  |
| 6  | 2.88599877  | -2.82350345 | -1.19257642 |
| 6  | 3.45371471  | -2.31946276 | 0.01305354  |
| 6  | 2.87880980  | -2.81777372 | 1.21765770  |
| 6  | -0.26451115 | 3.14893512  | 2.64163259  |
| 6  | -0.32909797 | 3.99310722  | 1.48623864  |
| 6  | 0.90590997  | 4.19862441  | 0.73280843  |
| 6  | -1.54579770 | 3.90292001  | 0.71529810  |
| 6  | -1.36465556 | 2.32406737  | 3.08306377  |
| 6  | -3.28401386 | 1.03334830  | 2.36560110  |
| 6  | -2.56268011 | 2.24793868  | 2.32695878  |
| 6  | -2.62607744 | 3.04216318  | 1.13796071  |
| 6  | 1.57816811  | -2.23656880 | 3.09417338  |
| 6  | 0.81733935  | -1.17544166 | 3.66133911  |
| 6  | -0.64314515 | -1.29211919 | 3.65576361  |
| 6  | -1.47282468 | -0.08808249 | 3.67764782  |
| 6  | -0.82978378 | 1.17806018  | 3.74955636  |
| 6  | -2.76238735 | -0.10497958 | 3.06974372  |
| 6  | -1.54143160 | 3.89944120  | -0.74855363 |
| 6  | -0.32015448 | 3.98598289  | -1.51264404 |
| 6  | 0.91034088  | 4.19509500  | -0.75284645 |
| 6  | -0.24868993 | 3.13633077  | -2.66360762 |
| 6  | -2.61918238 | 3.03666925  | -1.17355698 |
| 6  | -3.26981535 | 1.02203606  | -2.39553984 |
| 6  | -2.54870756 | 2.23680653  | -2.35836938 |
| 6  | -1.34619406 | 2.30936033  | -3.10766978 |
| 6  | -4.00182362 | 0.55468812  | 1.19869541  |
| 6  | -3.98155173 | 1.28764488  | -0.01768800 |
| 6  | -3.30271230 | 2.54997395  | -0.01866350 |
| 6  | -3.99457947 | 0.54891656  | -1.23067444 |
| 6  | 0.96966489  | 2.49519272  | -3.11292348 |
| 6  | 2.15822172  | 2.61832287  | -2.35421126 |
| 6  | 2.07495368  | 3.42403152  | -1.16062817 |
| 6  | 3.06378405  | 1.53560829  | -2.37716382 |



|   |             |             |             |
|---|-------------|-------------|-------------|
| 6 | 0.62449464  | 1.27493984  | -3.76855138 |
| 6 | 1.46367949  | 0.12747369  | -3.68543771 |
| 6 | 2.73794667  | 0.32181961  | -3.07861514 |
| 6 | 2.83585416  | -2.00839228 | -2.38870441 |
| 6 | 3.39885298  | -0.74857015 | -2.38630943 |
| 6 | -1.20116812 | -2.47570560 | -3.08681007 |
| 6 | -0.62133011 | -1.30949626 | -3.65886554 |
| 6 | 0.83916434  | -1.19282714 | -3.65628386 |
| 6 | 1.59658468  | -2.25123751 | -3.07955727 |
| 6 | -0.80737326 | 1.16020634  | -3.76550737 |
| 6 | -2.74401510 | -0.11961707 | -3.09114237 |
| 6 | -1.45084862 | -0.10558950 | -3.69141718 |
| 6 | -1.11045705 | -3.88265005 | -1.19900630 |
| 6 | -0.40606901 | -3.44616849 | -2.38801569 |
| 6 | 0.96447994  | -3.33720450 | -2.38508301 |
| 6 | -1.11762670 | -3.87694231 | 1.20528677  |
| 6 | -0.40333224 | -4.13965508 | 0.00587632  |
| 6 | -3.22602584 | -1.28361171 | -2.40157288 |
| 6 | -2.39924432 | -3.24321287 | 1.20233145  |
| 6 | -3.04182869 | -2.84315145 | -0.00507091 |
| 6 | -2.39206120 | -3.24893444 | -1.20670561 |
| 6 | -2.46730213 | -2.43529711 | -2.40158002 |
| 6 | -2.48159837 | -2.42390737 | 2.39285536  |
| 6 | -3.24029217 | -1.27224519 | 2.38285034  |
| 6 | -3.96232625 | -0.87477028 | 1.19924517  |
| 6 | -3.84503276 | -1.61937946 | -0.01037470 |
| 6 | -3.95510073 | -0.88052779 | -1.22419726 |
| 6 | 0.95020818  | -3.32583939 | 2.40111076  |
| 6 | -0.42033617 | -3.43481050 | 2.39639172  |
| 6 | -1.21957506 | -2.46104466 | 3.08581014  |
| 6 | 1.72341847  | -3.65569381 | -1.19166648 |
| 6 | 1.06008141  | -4.02189917 | 0.00996040  |
| 6 | 1.71624285  | -3.64997147 | 1.21376727  |

#

Vibrational frequencies

|       |       |       |       |       |       |       |
|-------|-------|-------|-------|-------|-------|-------|
| freq. | 52.3  | 65.4  | 196.8 | 209.6 | 211.5 | 214.4 |
| freq. | 219.9 | 262.2 | 269.7 | 270.5 | 272.7 | 274.2 |
| freq. | 285.7 | 295.0 | 322.7 | 327.5 | 336.2 | 338.9 |
| freq. | 338.9 | 341.3 | 347.5 | 348.9 | 350.5 | 353.5 |
| freq. | 358.1 | 359.2 | 374.3 | 377.5 | 403.0 | 404.7 |
| freq. | 408.0 | 422.2 | 424.4 | 430.3 | 436.6 | 442.7 |
| freq. | 446.6 | 458.2 | 461.0 | 465.6 | 469.0 | 474.7 |
| freq. | 475.6 | 484.0 | 485.2 | 486.4 | 490.1 | 493.2 |
| freq. | 496.5 | 499.5 | 501.0 | 505.3 | 506.7 | 511.4 |
| freq. | 517.8 | 521.3 | 530.9 | 547.7 | 556.5 | 558.4 |
| freq. | 583.7 | 588.9 | 590.0 | 592.2 | 595.8 | 603.9 |
| freq. | 606.6 | 612.0 | 612.7 | 615.8 | 623.1 | 624.3 |
| freq. | 625.7 | 627.4 | 630.8 | 630.9 | 638.5 | 641.4 |
| freq. | 643.1 | 645.8 | 648.2 | 653.5 | 655.4 | 657.2 |
| freq. | 658.0 | 660.5 | 664.4 | 665.4 | 666.7 | 669.0 |
| freq. | 672.1 | 672.6 | 674.3 | 675.3 | 675.9 | 676.4 |
| freq. | 677.9 | 680.2 | 680.8 | 681.2 | 684.6 | 686.4 |
| freq. | 687.7 | 688.3 | 690.3 | 692.6 | 693.9 | 694.1 |

|       |        |        |        |        |        |        |
|-------|--------|--------|--------|--------|--------|--------|
| freq. | 698.4  | 700.3  | 709.7  | 712.2  | 714.9  | 725.3  |
| freq. | 736.2  | 737.8  | 743.4  | 747.7  | 754.8  | 773.7  |
| freq. | 774.7  | 789.5  | 789.8  | 824.6  | 829.4  | 835.3  |
| freq. | 849.8  | 860.2  | 863.1  | 867.3  | 869.3  | 872.3  |
| freq. | 876.4  | 880.3  | 889.1  | 912.8  | 1005.3 | 1007.8 |
| freq. | 1010.6 | 1017.9 | 1018.2 | 1024.7 | 1026.9 | 1035.7 |
| freq. | 1038.6 | 1110.8 | 1117.4 | 1121.1 | 1124.0 | 1130.2 |
| freq. | 1140.3 | 1140.5 | 1146.3 | 1161.2 | 1164.0 | 1166.1 |
| freq. | 1181.5 | 1185.0 | 1192.0 | 1196.1 | 1205.1 | 1206.5 |
| freq. | 1215.2 | 1218.7 | 1222.2 | 1233.9 | 1235.3 | 1237.9 |
| freq. | 1246.5 | 1254.0 | 1260.3 | 1261.6 | 1267.4 | 1272.7 |
| freq. | 1273.1 | 1276.1 | 1277.6 | 1282.1 | 1287.6 | 1299.0 |
| freq. | 1315.6 | 1316.4 | 1318.5 | 1323.4 | 1324.1 | 1325.8 |
| freq. | 1328.3 | 1332.8 | 1338.7 | 1340.3 | 1341.3 | 1345.4 |
| freq. | 1352.2 | 1355.3 | 1364.2 | 1366.1 | 1368.5 | 1375.1 |
| freq. | 1378.7 | 1381.0 | 1382.8 | 1385.9 | 1390.6 | 1391.9 |
| freq. | 1391.9 | 1395.5 | 1412.3 | 1415.7 | 1420.0 | 1423.1 |
| freq. | 1424.8 | 1430.2 | 1433.1 | 1437.6 | 1437.7 | 1443.8 |
| freq. | 1448.1 | 1449.6 | 1455.0 | 1457.7 | 1466.5 | 1470.1 |
| freq. | 1475.2 | 1483.4 | 1486.7 | 1488.1 | 1496.6 | 1503.4 |
| freq. | 1503.5 | 1508.7 | 1521.5 | 1524.1 | 1525.9 | 1528.1 |
| freq. | 1529.3 | 1530.4 | 1532.4 | 1578.7 | 1588.9 | 1595.3 |
| freq. | 1596.1 | 1620.4 | 1626.7 |        |        |        |

---

---

7. ===== Y@C<sub>82</sub> non-relativistic PBE/n3zv//PBE/n3zv

=====

Atomic Coordinates:

|    |             |             |             |
|----|-------------|-------------|-------------|
| 39 | 0.04791904  | 2.15378298  | -0.00797041 |
| 6  | 3.84764132  | 1.18422605  | -1.20880752 |
| 6  | 3.70326930  | 1.90420883  | 0.00376433  |
| 6  | 2.81294558  | 3.03207296  | -0.00157229 |
| 6  | 3.84039346  | 1.18999789  | 1.22058438  |
| 6  | 4.03656868  | -0.22792508 | 1.22266195  |
| 6  | 4.04570565  | -0.97956639 | 0.01163851  |
| 6  | 4.04380548  | -0.23368661 | -1.20297741 |
| 6  | 3.05090843  | 1.54918283  | 2.38224145  |
| 6  | 2.14710050  | 2.63438490  | 2.34889100  |
| 6  | 2.07696494  | 3.43962251  | 1.15317181  |
| 6  | 0.95076734  | 2.51410158  | 3.09793128  |
| 6  | 2.82143036  | -1.99693539 | 2.40950271  |
| 6  | 3.38383857  | -0.73612253 | 2.40319858  |
| 6  | 2.71893454  | 0.33796047  | 3.08590299  |
| 6  | 1.44072672  | 0.14642405  | 3.68486974  |
| 6  | 0.60099126  | 1.29442024  | 3.75704358  |
| 6  | 2.88579538  | -2.82372548 | -1.19259762 |
| 6  | 3.45348193  | -2.31942102 | 0.01305534  |
| 6  | 2.87860973  | -2.81800025 | 1.21768413  |
| 6  | -0.26557905 | 3.15755630  | 2.64524482  |
| 6  | -0.33076622 | 4.00421855  | 1.48953854  |
| 6  | 0.90526452  | 4.19218852  | 0.73234637  |
| 6  | -1.55097638 | 3.91884688  | 0.71774670  |
| 6  | -1.36567893 | 2.32847694  | 3.08560027  |
| 6  | -3.28324799 | 1.03533867  | 2.36534149  |
| 6  | -2.56374582 | 2.25161923  | 2.32943453  |
| 6  | -2.62504435 | 3.04749329  | 1.13867416  |
| 6  | 1.57854422  | -2.23654538 | 3.09385511  |
| 6  | 0.81679498  | -1.17428581 | 3.65882500  |
| 6  | -0.64307967 | -1.29115791 | 3.65373304  |
| 6  | -1.47224362 | -0.08729811 | 3.67554864  |
| 6  | -0.82929656 | 1.18027238  | 3.74910852  |
| 6  | -2.76173308 | -0.10427386 | 3.06936580  |
| 6  | -1.54660476 | 3.91539390  | -0.75111290 |
| 6  | -0.32181387 | 3.99718682  | -1.51602320 |
| 6  | 0.90970228  | 4.18872240  | -0.75236484 |
| 6  | -0.24973886 | 3.14495498  | -2.66723940 |
| 6  | -2.61815804 | 3.04201286  | -1.17428517 |
| 6  | -3.26905467 | 1.02403033  | -2.39527910 |
| 6  | -2.54976497 | 2.24047624  | -2.36085550 |
| 6  | -1.34719798 | 2.31375742  | -3.11020407 |
| 6  | -4.00014256 | 0.55607501  | 1.19871560  |
| 6  | -3.97766191 | 1.28786621  | -0.01767589 |
| 6  | -3.29779689 | 2.55098089  | -0.01864994 |
| 6  | -3.99290090 | 0.55030263  | -1.23068826 |
| 6  | 0.96927879  | 2.49935996  | -3.10960400 |
| 6  | 2.16113723  | 2.62323050  | -2.35404299 |
| 6  | 2.08389096  | 3.43416026  | -1.16261042 |

|   |             |             |             |
|---|-------------|-------------|-------------|
| 6 | 3.06510321  | 1.53788345  | -2.37684534 |
| 6 | 0.62342657  | 1.27655138  | -3.76498239 |
| 6 | 1.46270195  | 0.12891761  | -3.68237183 |
| 6 | 2.73731430  | 0.32331983  | -3.07670865 |
| 6 | 2.83573567  | -2.00833261 | -2.38862364 |
| 6 | 3.39811999  | -0.74749688 | -2.38495711 |
| 6 | -1.20188643 | -2.47640135 | -3.08687206 |
| 6 | -0.62127794 | -1.30852539 | -3.65683098 |
| 6 | 0.83860003  | -1.19166237 | -3.65377728 |
| 6 | 1.59695385  | -2.25121393 | -3.07923289 |
| 6 | -0.80688029 | 1.16242233  | -3.76503118 |
| 6 | -2.74335761 | -0.11891000 | -3.09075444 |
| 6 | -1.45027128 | -0.10479654 | -3.68929265 |
| 6 | -1.11073965 | -3.88425619 | -1.19921267 |
| 6 | -0.40622590 | -3.44692516 | -2.38821285 |
| 6 | 0.96438134  | -3.33776034 | -2.38511555 |
| 6 | -1.11791120 | -3.87854082 | 1.20550015  |
| 6 | -0.40357934 | -4.14081511 | 0.00588001  |
| 6 | -3.22557391 | -1.28312735 | -2.40148172 |
| 6 | -2.39928520 | -3.24395103 | 1.20246742  |
| 6 | -3.04138467 | -2.84359351 | -0.00506936 |
| 6 | -2.39209988 | -3.24967629 | -1.20683825 |
| 6 | -2.46753102 | -2.43604557 | -2.40227680 |
| 6 | -2.48183252 | -2.42464634 | 2.39355209  |
| 6 | -3.23984108 | -1.27176036 | 2.38276161  |
| 6 | -3.96127624 | -0.87420353 | 1.19933867  |
| 6 | -3.84337531 | -1.61844271 | -0.01037120 |
| 6 | -3.95404992 | -0.87996264 | -1.22428614 |
| 6 | 0.95010763  | -3.32638596 | 2.40114983  |
| 6 | -0.42049527 | -3.43555563 | 2.39659007  |
| 6 | -1.22029223 | -2.46173112 | 3.08586719  |
| 6 | 1.72342757  | -3.65677124 | -1.19178219 |
| 6 | 1.06008765  | -4.02295435 | 0.00996603  |
| 6 | 1.71625317  | -3.65105293 | 1.21389454  |

#

Vibrational frequencies

|       |       |       |       |       |       |       |
|-------|-------|-------|-------|-------|-------|-------|
| freq. | 37.6  | 39.2  | 177.9 | 208.2 | 211.8 | 214.8 |
| freq. | 220.4 | 249.7 | 269.9 | 270.1 | 273.0 | 274.5 |
| freq. | 285.8 | 295.0 | 322.7 | 324.3 | 327.4 | 338.3 |
| freq. | 338.9 | 342.3 | 347.7 | 349.0 | 349.7 | 353.5 |
| freq. | 358.1 | 358.9 | 372.5 | 376.5 | 396.3 | 403.1 |
| freq. | 410.3 | 419.3 | 421.8 | 428.6 | 436.5 | 441.4 |
| freq. | 446.3 | 455.3 | 458.6 | 464.2 | 465.7 | 474.2 |
| freq. | 474.5 | 482.8 | 482.9 | 484.6 | 489.5 | 492.5 |
| freq. | 496.7 | 497.6 | 498.9 | 504.8 | 506.0 | 511.1 |
| freq. | 517.4 | 520.6 | 529.9 | 542.8 | 552.8 | 555.4 |
| freq. | 570.2 | 588.5 | 589.5 | 591.0 | 595.6 | 599.0 |
| freq. | 601.7 | 611.1 | 611.4 | 612.2 | 620.6 | 621.9 |
| freq. | 624.0 | 624.5 | 625.5 | 627.7 | 629.3 | 638.5 |
| freq. | 642.0 | 644.1 | 647.8 | 648.0 | 653.4 | 653.7 |
| freq. | 654.0 | 656.2 | 662.1 | 663.1 | 665.7 | 666.0 |
| freq. | 668.3 | 669.2 | 670.3 | 672.4 | 672.4 | 674.4 |
| freq. | 674.7 | 677.3 | 679.0 | 679.0 | 680.7 | 682.2 |

|       |        |        |        |        |        |        |
|-------|--------|--------|--------|--------|--------|--------|
| freq. | 682.6  | 684.0  | 687.4  | 687.8  | 690.5  | 690.6  |
| freq. | 691.3  | 695.8  | 708.8  | 714.9  | 715.4  | 726.6  |
| freq. | 735.8  | 738.4  | 744.2  | 747.2  | 761.4  | 773.3  |
| freq. | 774.3  | 789.0  | 789.5  | 824.0  | 827.5  | 834.3  |
| freq. | 849.2  | 859.4  | 863.1  | 867.1  | 868.4  | 872.2  |
| freq. | 876.6  | 878.1  | 887.5  | 912.3  | 1003.5 | 1007.2 |
| freq. | 1009.2 | 1017.2 | 1017.9 | 1023.3 | 1026.7 | 1034.7 |
| freq. | 1037.6 | 1110.3 | 1117.0 | 1118.3 | 1123.7 | 1129.5 |
| freq. | 1139.0 | 1139.5 | 1144.8 | 1160.9 | 1163.4 | 1164.6 |
| freq. | 1181.3 | 1183.4 | 1190.7 | 1195.0 | 1203.2 | 1205.5 |
| freq. | 1214.5 | 1216.0 | 1221.1 | 1232.2 | 1233.3 | 1237.3 |
| freq. | 1245.9 | 1252.8 | 1259.8 | 1261.0 | 1267.3 | 1271.7 |
| freq. | 1273.0 | 1275.3 | 1276.6 | 1281.2 | 1285.8 | 1297.9 |
| freq. | 1312.8 | 1315.1 | 1317.6 | 1322.9 | 1323.0 | 1324.2 |
| freq. | 1326.2 | 1332.7 | 1338.7 | 1338.7 | 1339.1 | 1344.3 |
| freq. | 1351.1 | 1354.7 | 1362.4 | 1365.7 | 1367.5 | 1368.6 |
| freq. | 1375.0 | 1377.3 | 1378.7 | 1383.5 | 1388.9 | 1390.0 |
| freq. | 1391.2 | 1393.7 | 1410.9 | 1412.8 | 1417.7 | 1421.2 |
| freq. | 1422.9 | 1429.3 | 1430.7 | 1436.4 | 1437.2 | 1440.7 |
| freq. | 1445.0 | 1447.3 | 1452.3 | 1456.6 | 1464.5 | 1467.2 |
| freq. | 1473.3 | 1482.1 | 1485.2 | 1486.6 | 1495.8 | 1501.6 |
| freq. | 1501.9 | 1506.3 | 1520.4 | 1523.8 | 1524.3 | 1526.5 |
| freq. | 1527.9 | 1529.3 | 1530.5 | 1576.7 | 1587.3 | 1592.2 |
| freq. | 1593.6 | 1619.0 | 1625.5 |        |        |        |

---

---
